# Supplementary material
Source: PubMed Central journal article supplement (PMC2206597)

**A**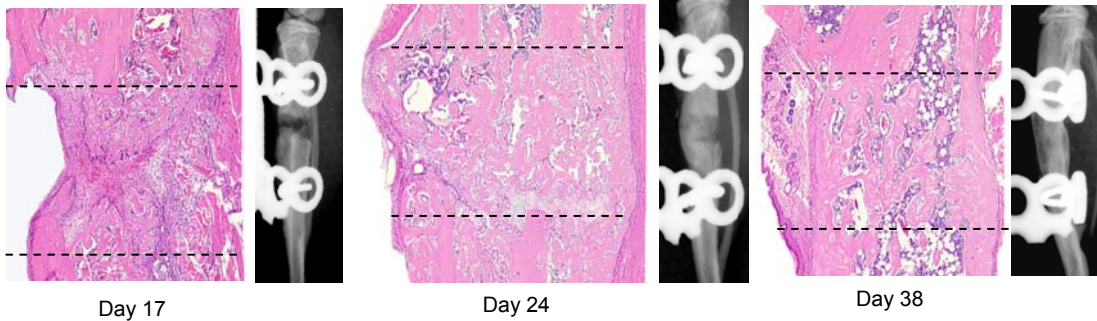**B**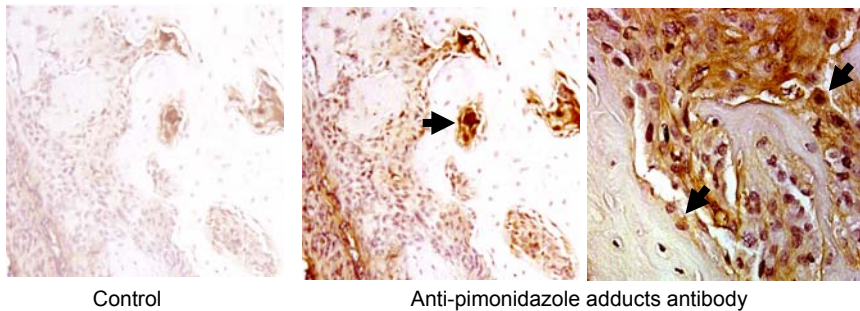**C**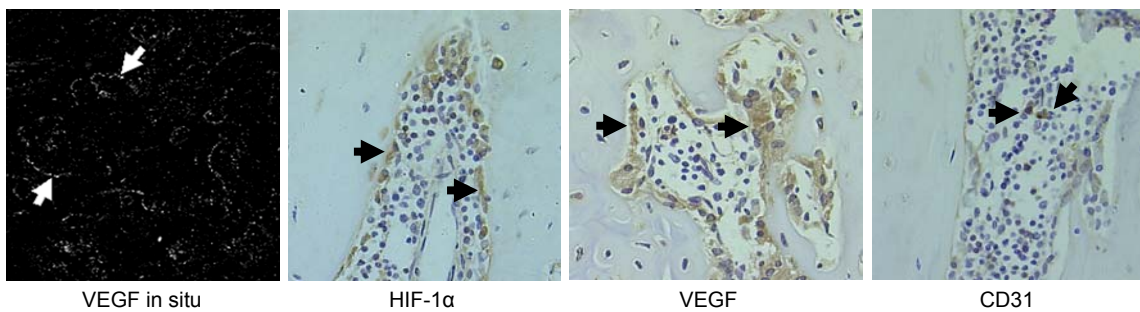

Supplement: pnas_0708474105_1.pdf [file pnas_0708474105_1.pdf]

Day 24

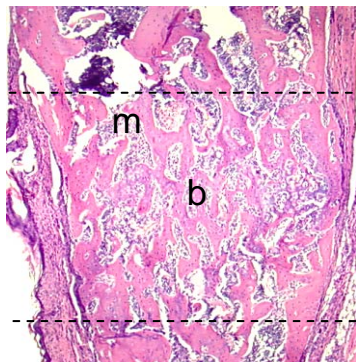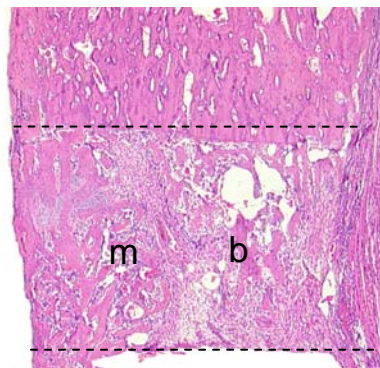

Day 31

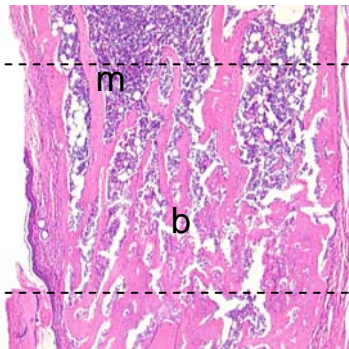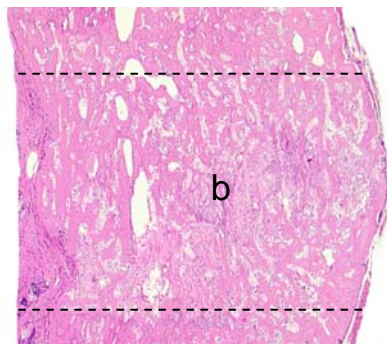

Day 38

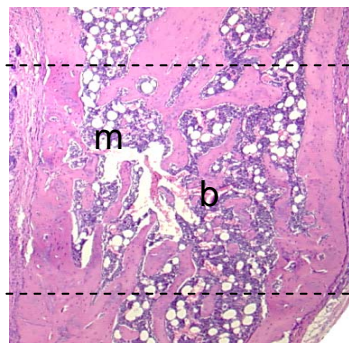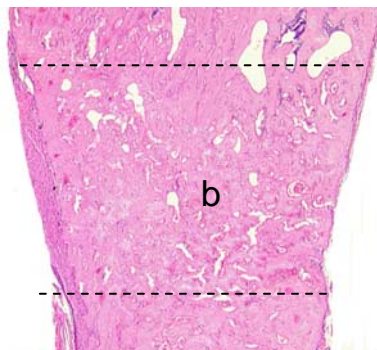

Control

$\Delta VHL$

Supplement: pnas_0708474105_2.pdf [file pnas_0708474105_2.pdf]

Day 24

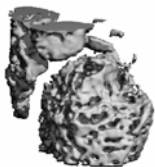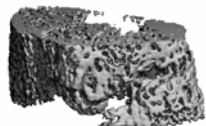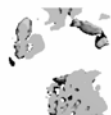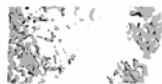

Control

$\Delta$ VHL

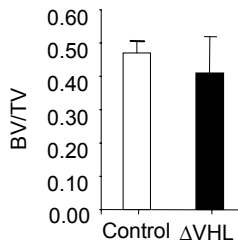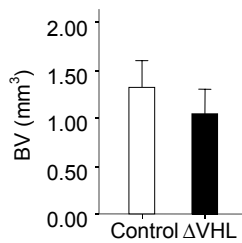

Day 31

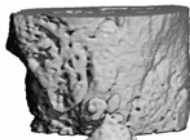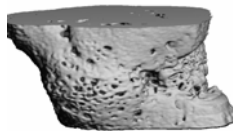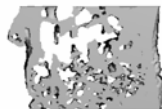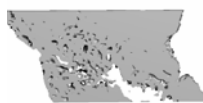

Control

$\Delta$ VHL

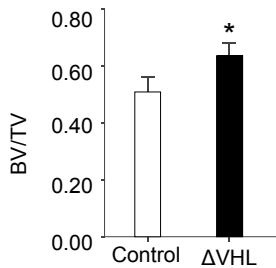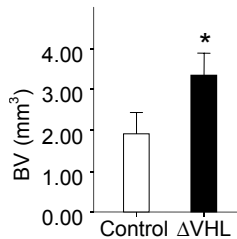

Supplement: pnas_0708474105_3.pdf [file pnas_0708474105_3.pdf]

Day 5

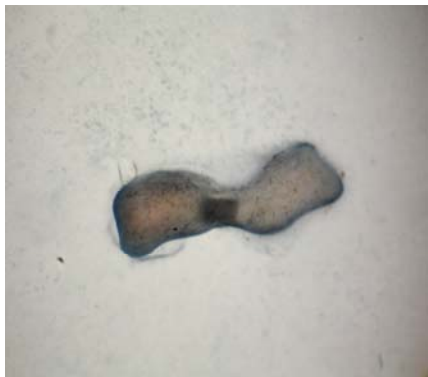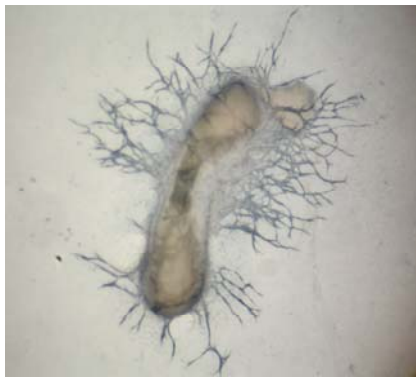

Day 7

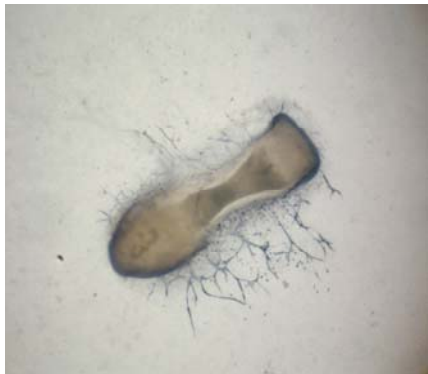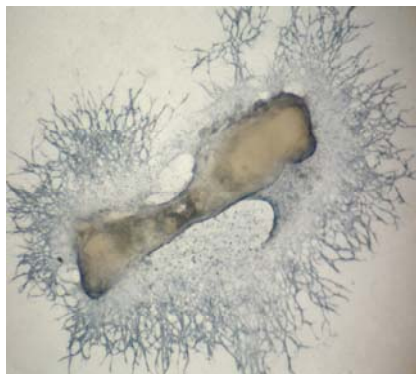

Day 10

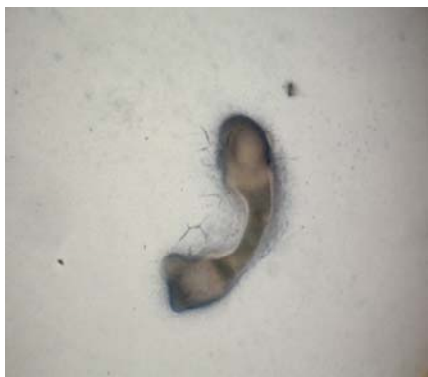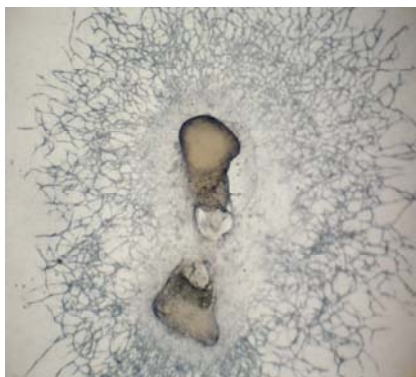

Control

VEGF 10 ng/ml

Supplement: pnas_0708474105_4.pdf [file pnas_0708474105_4.pdf]

Day 3

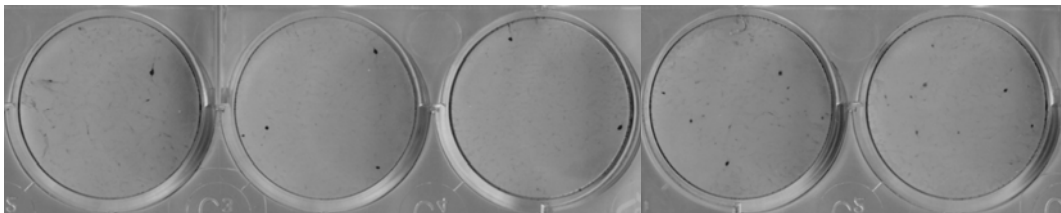

Day 7

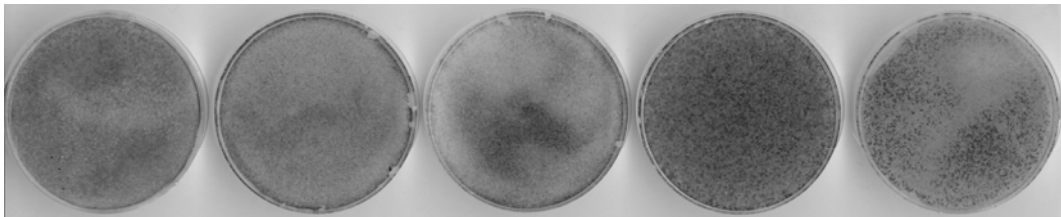

Day 14

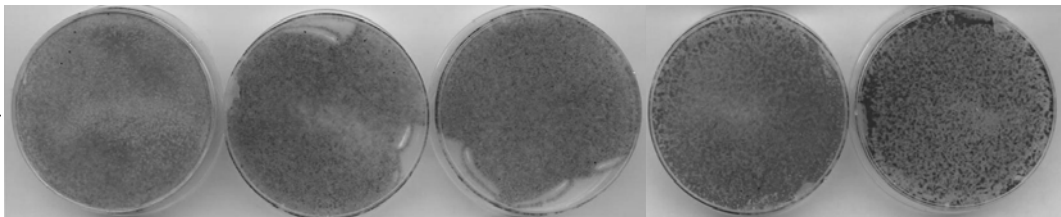

Control

DFO 50µM

DFO 200µM

L-mim 300µM

L-mim 500µM

Supplement: pnas_0708474105_5.pdf [file pnas_0708474105_5.pdf]
